# Supplementary material for: Characterization of Lysine Monomethylome and Methyltransferase in Model Cyanobacterium Synechocystis sp. PCC 6803
Source: PubMed Central journal article supplement — Genomics Proteomics Bioinformatics. 2020 Oct 30;18(3):289–304. doi: 10.1016/j.gpb.2019.04.005 (PMC7801250; doi:10.1016/j.gpb.2019.04.005), 2020-10-30

**A**

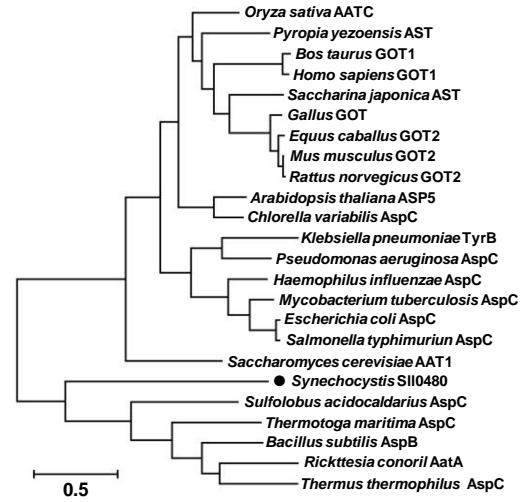

**B**

|                                        |                                                             |                                     |
|----------------------------------------|-------------------------------------------------------------|-------------------------------------|
| <i>Synechocystis</i> SII0480           | AFTTANPNAQV I K L G I G D V T E P L P L A C R Q A M A - K A | 58                                  |
| <i>Chlorella variabilis</i> AspC       | EAFKRD TNSKKMNLGVGAYRDDNGKPYVLP SVRKA                       |                                     |
| <i>Escherichia coli</i> AspC           | EAFKRD TNSKKMNLGVGAYRDDNGKPYVLP SVRKA                       |                                     |
| <i>Bacillus subtilis</i> AspB          | EAFKRD TNSKKMNLGVGAYRDDNGKSYV LNCV RKA                      |                                     |
| <i>Rickettsia conorii</i> AatA         | DLFRADERPGK I N L G I G V Y K D E T G K T P V L T S V K K   |                                     |
| <i>Sulfolobus acidocaldarius</i> AspC  | EAYKRD TNSKKMNLGVGAYRDDNGKPYVLP SVRKA                       |                                     |
| <i>Mycobacterium tuberculosis</i> AspC | EAFKAD TNGMKLNLGVGAYRTEELQP YV LNVV KKA                     |                                     |
| <i>Saccharomyces cerevisiae</i> AAT1   | RSVQKEKGIKIVNFGIGQP - - - - DFPTFKIRDE                      |                                     |
| <i>Arabidopsis thaliana</i> ASP5       | DSFRQDPRENK I N L G I G V Y K D E T G K T P V L S C V K K A |                                     |
| <i>Oryza sativa</i> AATC               | DAFNKDKDPKKVSLGVGAYRGDDGKPFV LNTV RKA                       |                                     |
| <i>Equus caballus</i> GOT2             | SAFLADEAPNK I S L G V G A F R T D E G K P Y V L P V V K R V |                                     |
| <i>Homo sapiens</i> GOT1               | EAFKSETRENK I N L G I G V Y K D A Q G T T P I M H A V K E A |                                     |
|                                        | 109                                                         | 176                                 |
| <i>Synechocystis</i> SII0480           | CDTGN I L D I F G K D N T                                   | KKVDL I Y L C F P N N P T G A T     |
| <i>Chlorella variabilis</i> AspC       | RVGASFLQRFFKFSR                                             | QSVLL LHACAHN - P T G V D           |
| <i>Escherichia coli</i> AspC           | RVGASFLQRFFKFSR                                             | QSVLL LHACAHN - P T G V D           |
| <i>Bacillus subtilis</i> AspB          | RVGANFLQRFFKFSR                                             | KS I I L L H A C A H N - P T G V D  |
| <i>Rickettsia conorii</i> AatA         | RVAADF LAKNTSVKR                                            | GDV V L F H G C C H N - P T G I D   |
| <i>Sulfolobus acidocaldarius</i> AspC  | RIGANFLQRFFKFSR                                             | QS I I L L H A C A H N - P T G V D  |
| <i>Mycobacterium tuberculosis</i> AspC | RLAAL I E R Y F P G A K                                     | GS F I L L H G C A H N - P T G I D  |
| <i>Saccharomyces cerevisiae</i> AAT1   | SLYLAFLLYVNP GDE                                            | - - - M V V L N N P H N - P T G M V |
| <i>Arabidopsis thaliana</i> ASP5       | R I A A D F I A K Q T S A K R                               | GDV I L L H G C C H N - P T G I D   |
| <i>Oryza sativa</i> AATC               | RVAGDLFARFRGAGS                                             | ES I F L L H A C A H N - P T G V D  |
| <i>Equus caballus</i> GOT2             | RVG I T F L G R F L R T S G                                 | GSV I V L H G C A H N - P T G A D   |
| <i>Homo sapiens</i> GOT1               | R I A A E F I K R Q T K A Q N                               | GDV V L L H G C C H N - P T G I D   |

**C**

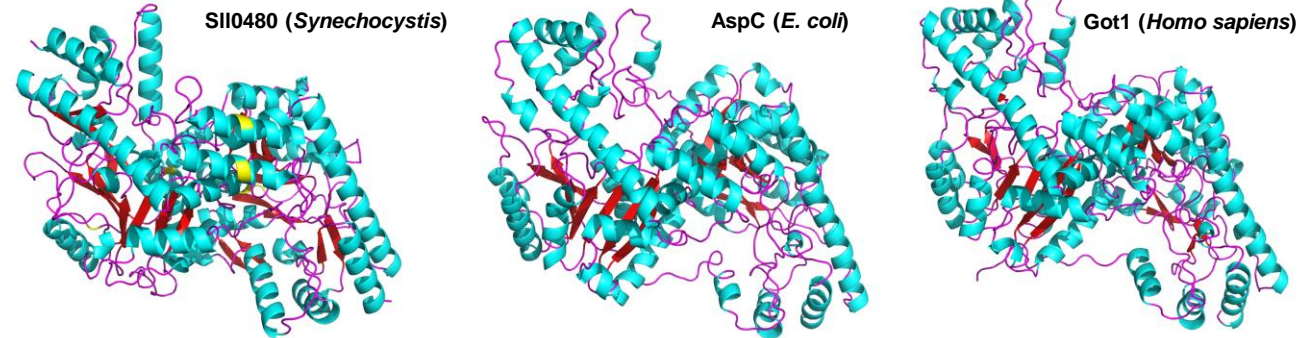

Supplement: mmc3.pdf [file mmc3.pdf]
