# Supplementary material for: Characterization of Lysine Monomethylome and Methyltransferase in Model Cyanobacterium Synechocystis sp. PCC 6803
Source: PubMed Central journal article supplement — Genomics Proteomics Bioinformatics. 2020 Oct 30;18(3):289–304. doi: 10.1016/j.gpb.2019.04.005 (PMC7801250; doi:10.1016/j.gpb.2019.04.005), 2020-10-30

**A** CpcM (*Synechocystis*)

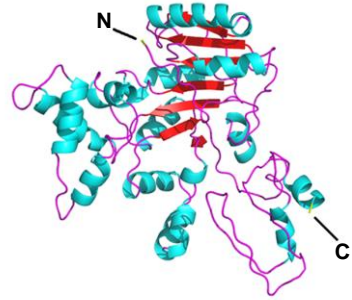

**B** PKMT2 (*Rickettsia typhi*)

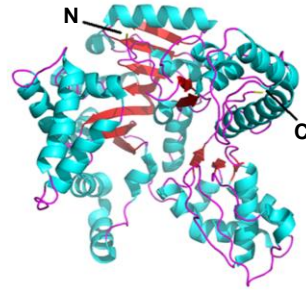

**C** PKMT1 (*Rickettsia prowazekii*)

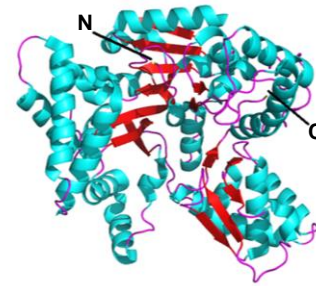

**D** aKMT (*Sulfolobus islandicus*)

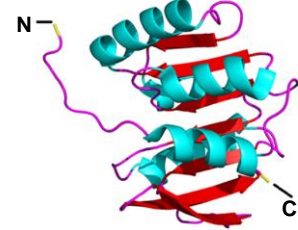

**E** PrmA (*E. coli*)

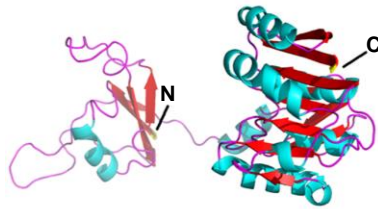

**F** PrmA (*Thermus thermophilus*)

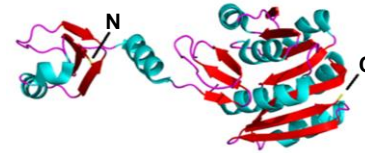

Supplement: mmc2.pdf [file mmc2.pdf]
