# Supplementary figures and images for: Characterization of Lysine Monomethylome and Methyltransferase in Model Cyanobacterium Synechocystis sp. PCC 6803
Source: PubMed Central journal article supplement — Genomics Proteomics Bioinformatics. 2020 Oct 30;18(3):289–304. doi: 10.1016/j.gpb.2019.04.005 (PMC7801250; doi:10.1016/j.gpb.2019.04.005), 2020-10-30

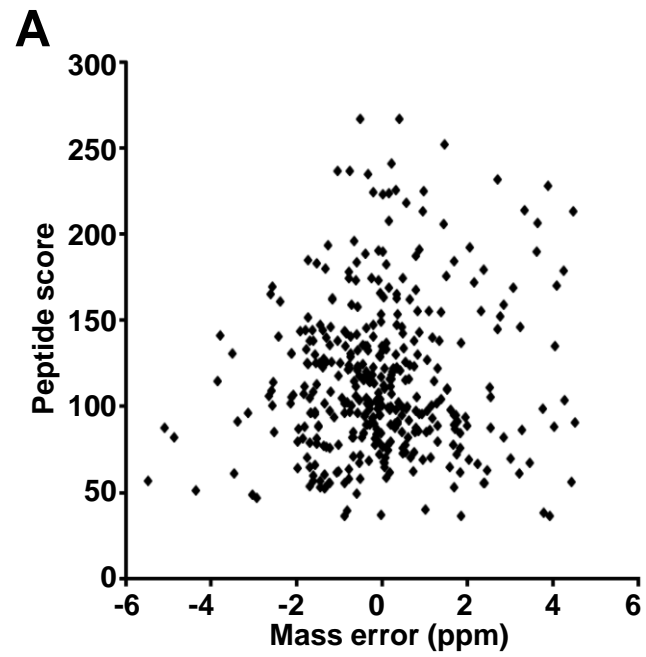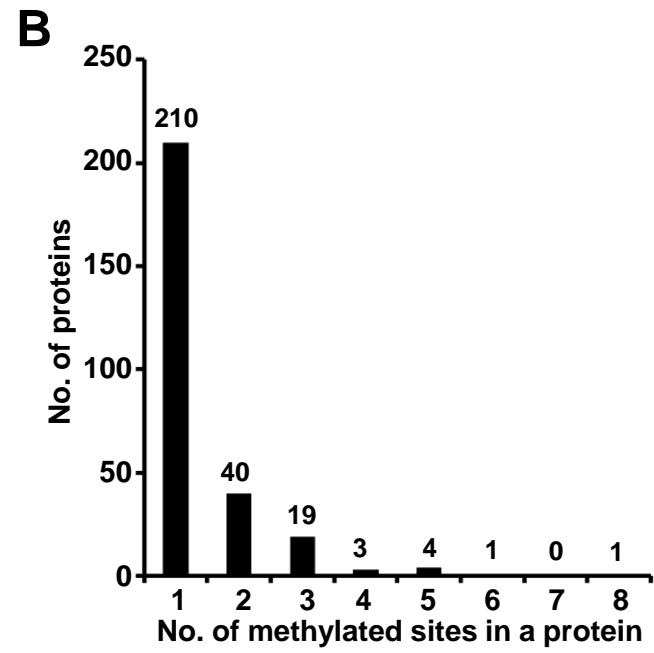

Supplement: mmc1.pdf [file mmc1.pdf]

### A Slr2094

|         |   |   |   |   |   |
|---------|---|---|---|---|---|
| CpcM    | + | - | # | + | + |
| Slr2094 | - | + | + | + | + |
| SAM     | + | + | + | + | - |

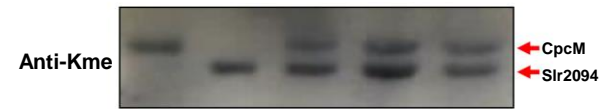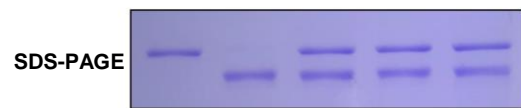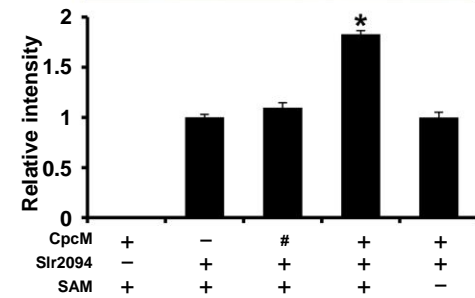

### B Slr0394

|         |   |   |   |   |   |
|---------|---|---|---|---|---|
| CpcM    | + | - | # | + | + |
| Slr0394 | - | + | + | + | + |
| SAM     | + | + | + | + | - |

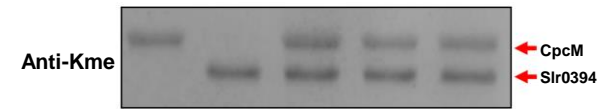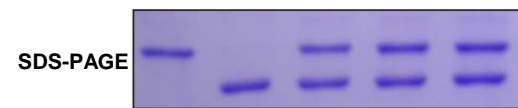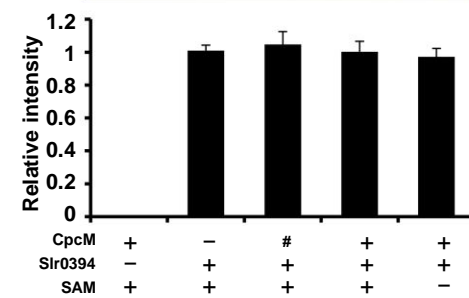

Supplement: mmc4.pdf [file mmc4.pdf]
